# Supplementary material for: Upper Norian conodonts from the Baoshan block, western Yunnan, southwestern China, and implications for conodont turnover
Source: PeerJ. 2023 Jan 17;11:e14517. doi: 10.7717/peerj.14517 (PMC9854380; doi:10.7717/peerj.14517)
Supplement: Supplemental Information 1 [file peerj-11-14517-s001.xlsx]

## Sheet: Sheet1
Species name	Figure no.	catalog no.	storage location	Note
?Ancyrogondolella praeslovakensis (Kozur, Masset and Moix, 2007)	3MM–3OO	MDP8-001	School of Earth Sciences, China University of Geosciences, Wuhan, 430074, China	is characterized by a high blade that is abrupt on the posterior end, high anterior marginal denticles, smooth posterior lateral platform margins, peculiar stepped lateral profile of the base, nearly symmetrically bifid keel end, anteriorly located cusp and sub-centrally located pit
Epigondolella carinata Orchard, 1991b	3A–3C	MDP7-038	School of Earth Sciences, China University of Geosciences, Wuhan, 430074, China	the inner anterior platform is broken and the broken part is not a marginal denticle under the stereomicroscope
	3D–3F	MDP8-025	School of Earth Sciences, China University of Geosciences, Wuhan, 430074, China	the anteriormost denticle on the outer platform margin is broken but can still be easily discerned
	3G–3H	POT1_i105	School of Earth Sciences, China University of Geosciences, Wuhan, 430074, China	the morphological features of the platform are nearly identicle with that of the specimen figured as 3O–3Q
	3I–3K	MDP7-113	School of Earth Sciences, China University of Geosciences, Wuhan, 430074, China	early adult species
	3L–3N	MDP7_i117	School of Earth Sciences, China University of Geosciences, Wuhan, 430074, China	early adult species
	3O–3Q	MDP10-059	School of Earth Sciences, China University of Geosciences, Wuhan, 430074, China	adult species; has two and one stout marginal denticles on anterior platform
	3R–3T	POT1_i022	School of Earth Sciences, China University of Geosciences, Wuhan, 430074, China	variant species; the marginal denticles are irregulary arranged, but other morphological features match with the conodont fauna of E. carinata from the Potou section and the Madoupo section.
Epigondolella aff. englandi Orchard, 1991b	4X–4Y	POT1_i008	School of Earth Sciences, China University of Geosciences, Wuhan, 430074, China	the platform length to the blade width ratio is about 1; two symmetrically arranged marginal denticles
	4Z–4AA	POT1_i020	School of Earth Sciences, China University of Geosciences, Wuhan, 430074, China
	4BB–4CC	MDP10-061	School of Earth Sciences, China University of Geosciences, Wuhan, 430074, China
	4DD–4FF	POT1_i060	School of Earth Sciences, China University of Geosciences, Wuhan, 430074, China	three symmetrically arranged marginal denticles decease in size or height toward the posterior
	4GG–4II	POT8_i036	School of Earth Sciences, China University of Geosciences, Wuhan, 430074, China	the platform is relatively small and the blade is quite developed; the inner posterior marginal denticle is small and the outer posterior marginal denticle relatively bigger
	4JJ–4LL	POT1_i009	School of Earth Sciences, China University of Geosciences, Wuhan, 430074, China
	5CC–5EE	MDP7-112	School of Earth Sciences, China University of Geosciences, Wuhan, 430074, China	juvenile species; one posterior marginal denticle has not grown yet, other morphological features, such as the shape of the platform, the blade and the keel, the length of the blade, free blade and the platform
Epigondolella passerii (Rigo and Du, 2022)	4A–4C	POT7_i100	School of Earth Sciences, China University of Geosciences, Wuhan, 430074, China	there is a prominent constriction on the middle of the platform, the platform margins nearly uniformly develop marginal denticles, commonly there are 3~4 anterior marginal denticles and a pair of posterior marginal denticles
	4D–4F	POT1_i104	School of Earth Sciences, China University of Geosciences, Wuhan, 430074, China
	4G–4I	POT2_i097	School of Earth Sciences, China University of Geosciences, Wuhan, 430074, China
	4J–4L	POT1_i102	School of Earth Sciences, China University of Geosciences, Wuhan, 430074, China
	4M–4N	POT5_i098	School of Earth Sciences, China University of Geosciences, Wuhan, 430074, China
	4O–4P	POT1_i014	School of Earth Sciences, China University of Geosciences, Wuhan, 430074, China
	4Q	MDP7-3503	School of Earth Sciences, China University of Geosciences, Wuhan, 430074, China
	4R–4S	MDP7-3301	School of Earth Sciences, China University of Geosciences, Wuhan, 430074, China
Epigondolella sp.	3U–3W	POT1_i011	School of Earth Sciences, China University of Geosciences, Wuhan, 430074, China	the marginal denticles inordinately arranged, the keel posterior to the pit is very short and hence can be inferred as a juvenile specimen; oval platform
	3X–3Z	MDP8_i059	School of Earth Sciences, China University of Geosciences, Wuhan, 430074, China	has a wide, subrounded platform, a pair of sharp marginal denticles and three outwarly projected posterior marginal denticles
	3AA–3BB	POT9_i050	School of Earth Sciences, China University of Geosciences, Wuhan, 430074, China
Mockina bidentata (Mosher, 1968)	5FF–5HH	MDP7-3902	School of Earth Sciences, China University of Geosciences, Wuhan, 430074, China	wide, subrounded platform; convex lateral profile
	5II	MDP10-060	School of Earth Sciences, China University of Geosciences, Wuhan, 430074, China	wide, oval platform; convex lateral profile
	6A–6B	POT1_i006	School of Earth Sciences, China University of Geosciences, Wuhan, 430074, China	smaller in size; has a shorter blade consisting of less fused and few relatively big and wide denticles
	6C–6E	POT1_i007	School of Earth Sciences, China University of Geosciences, Wuhan, 430074, China
	6E–6F	POT1_i018	School of Earth Sciences, China University of Geosciences, Wuhan, 430074, China
	6G–6H	POT1_i023	School of Earth Sciences, China University of Geosciences, Wuhan, 430074, China
	6L–6M	POT1_i015	School of Earth Sciences, China University of Geosciences, Wuhan, 430074, China
	6N–6O	POT1_i016	School of Earth Sciences, China University of Geosciences, Wuhan, 430074, China
	6P–6Q	POT1_i021	School of Earth Sciences, China University of Geosciences, Wuhan, 430074, China
	6R–6S	POT1_i017	School of Earth Sciences, China University of Geosciences, Wuhan, 430074, China
	6T–6U	POT1_i019	School of Earth Sciences, China University of Geosciences, Wuhan, 430074, China
	6V	POT3-1	School of Earth Sciences, China University of Geosciences, Wuhan, 430074, China
	6I–6K	POT1_i013	School of Earth Sciences, China University of Geosciences, Wuhan, 430074, China	the posterior platform is curved
	6W–6Y	POT4_i030	School of Earth Sciences, China University of Geosciences, Wuhan, 430074, China	resembles the holotype with a long anterior blade consisting of many higly fused denticles and a long posterior carina of three nodes
	6Z–6BB	POT5_i047	School of Earth Sciences, China University of Geosciences, Wuhan, 430074, China
	6CC–6EE	POT8_i038	School of Earth Sciences, China University of Geosciences, Wuhan, 430074, China
	6FF–6GG	POT8_i040	School of Earth Sciences, China University of Geosciences, Wuhan, 430074, China	Although the specimen is slightly broken, the pair of marginal denticles can still be seen clearly in upper view and in lateral view.
	6HH	POT10_i081	School of Earth Sciences, China University of Geosciences, Wuhan, 430074, China	juvenile species; has extremely reduced platform and a pair of prominent marginal denticles
	6II–6JJ	POT1_i024	School of Earth Sciences, China University of Geosciences, Wuhan, 430074, China	early juvenile species; no platform or marginal denticles developed
	6DDD	POT14-1	School of Earth Sciences, China University of Geosciences, Wuhan, 430074, China
	7U–7V	MDP8_i044	School of Earth Sciences, China University of Geosciences, Wuhan, 430074, China
	7W–7X	MDP7_i115	School of Earth Sciences, China University of Geosciences, Wuhan, 430074, China
	7Y–7Z	MDP7_i116	School of Earth Sciences, China University of Geosciences, Wuhan, 430074, China
	7AA	MDP10-4503	School of Earth Sciences, China University of Geosciences, Wuhan, 430074, China
	7BB	MDP10-5207	School of Earth Sciences, China University of Geosciences, Wuhan, 430074, China
	7CC	MDP7-3203	School of Earth Sciences, China University of Geosciences, Wuhan, 430074, China
?Mockina bidentata (Mosher, 1968)	3GG–3II	POT9-48	School of Earth Sciences, China University of Geosciences, Wuhan, 430074, China	an additional small denticle or node develops on the outer anteriormost platform margin
Mockina elongata (Orchard, 1991b)	5A–5C	MDP8_i053	School of Earth Sciences, China University of Geosciences, Wuhan, 430074, China	the outer platform margin has three erect marginal denticles
	5V–5X	MDP8_i041	School of Earth Sciences, China University of Geosciences, Wuhan, 430074, China
	5D–5F	MDP8_i060	School of Earth Sciences, China University of Geosciences, Wuhan, 430074, China	the outer platform margin has two marginal denticles
	5G–5H	MDP8_i058	School of Earth Sciences, China University of Geosciences, Wuhan, 430074, China
	5I	MDP8_i036	School of Earth Sciences, China University of Geosciences, Wuhan, 430074, China
	5J–5L	MDP8_i045	School of Earth Sciences, China University of Geosciences, Wuhan, 430074, China
	5M–5N	MDP8_i051	School of Earth Sciences, China University of Geosciences, Wuhan, 430074, China
	5P–5R	MDP8_i049	School of Earth Sciences, China University of Geosciences, Wuhan, 430074, China
	5S–5U	MDP8_i048	School of Earth Sciences, China University of Geosciences, Wuhan, 430074, China
Mockina medionorica Kozur, 2003	5Y–5Z	MDP12-i118	School of Earth Sciences, China University of Geosciences, Wuhan, 430074, China	the low carinal nodes posterior to the anteirorly located cusp increase in size toward the posterior, and the last carinal node or denticle is very big and is far from the platform end; the posterior blade moderaly descends to the low carina
	5AA-5BB	MDP8-i039	School of Earth Sciences, China University of Geosciences, Wuhan, 430074, China	the specimen is broken but the morphological features of the platform, the low carina and the keel as well as the pit is very similar with that of the specimen Fig. 5Y–5Z
?Mockina medionorica Kozur, 2003	7EE–7FF	MDP8-011	School of Earth Sciences, China University of Geosciences, Wuhan, 430074, China	the platform is rectangle and only develops a pair of big and stout anterior marginal denticles, the posterior carina seems to reach the platform which is different from that of M. medionorica
Mockina zapfei (Kozur, 1973)	3RR–3SS	MDP8-2204	School of Earth Sciences, China University of Geosciences, Wuhan, 430074, China	juvenile species of typical M. zapfei
	7A–7C	MDP8_i040	School of Earth Sciences, China University of Geosciences, Wuhan, 430074, China	typica M. zapfei, develops a small node on the outer posterior platform margin
	7D–7F	MDP8_i061	School of Earth Sciences, China University of Geosciences, Wuhan, 430074, China	retention of a weakly asymmetrically bifurcated keel and many fused and continuously aligned lower carinal nodes that extend to the sub-middle platform end
	7G–7I	MDP8_i109	School of Earth Sciences, China University of Geosciences, Wuhan, 430074, China	The posterior lateral platform margins are smooth, the anterior platform develops two pairs of marginal denticles, the cusp and the pit are anteriorly located, the keel is pointed and the platform end seems to be unornamented, these features match with M. matthewi; however, the specmen is quite identicle with other two specimens (Fig. 5J–5L) from the same sample MDP8, all having one posterior pla…
	7J–7L	MDP8_i039	School of Earth Sciences, China University of Geosciences, Wuhan, 430074, China	possession of two denticles on each anterior platform margin, with one side of the posterior platform margin deflecting toward the other side near the platform end.
	7M–7O	MDP8_i043	School of Earth Sciences, China University of Geosciences, Wuhan, 430074, China
	7DD	MDP10-4402	School of Earth Sciences, China University of Geosciences, Wuhan, 430074, China
	8A	MDP8_1802	School of Earth Sciences, China University of Geosciences, Wuhan, 430074, China	early juvenile species
	8B	MDP8-1901	School of Earth Sciences, China University of Geosciences, Wuhan, 430074, China	early juvenile species
	8C–8E	MDP8-019	School of Earth Sciences, China University of Geosciences, Wuhan, 430074, China	late juvenile species
	8F–8H	MDP8_i108	School of Earth Sciences, China University of Geosciences, Wuhan, 430074, China	late juvenile species
	8I–8K	MDP8-902	School of Earth Sciences, China University of Geosciences, Wuhan, 430074, China	early adult species
	8L–8N	MDP8_i035	School of Earth Sciences, China University of Geosciences, Wuhan, 430074, China	adult species
	8O–8Q	MDP8_i057	School of Earth Sciences, China University of Geosciences, Wuhan, 430074, China	late adult species
	8R–8T	MDP8_i055	School of Earth Sciences, China University of Geosciences, Wuhan, 430074, China	late adult species
	8U–8W	MDP_i037	School of Earth Sciences, China University of Geosciences, Wuhan, 430074, China	adult species; has a narrow-rounded platform end rather than typical pointed platform end and relatively sub-straight posterior carina and keel
	8X–8Y	MDP8-2909	School of Earth Sciences, China University of Geosciences, Wuhan, 430074, China	late juvenile species
	8Z–8BB	MDP8_i054	School of Earth Sciences, China University of Geosciences, Wuhan, 430074, China	development of small nodes on the deflected posterior margin and platform end to form a denticulated platform termination
	8CC–8EE	MDP8-005	School of Earth Sciences, China University of Geosciences, Wuhan, 430074, China
	9A	MDP7-4101	School of Earth Sciences, China University of Geosciences, Wuhan, 430074, China	juvenile species
	9B	MDP8-008	School of Earth Sciences, China University of Geosciences, Wuhan, 430074, China	late juvenile species
	9C–9E	MDP8-1301	School of Earth Sciences, China University of Geosciences, Wuhan, 430074, China	adult species; is characterized by a smooth, rather than sudden, deflection of one platform margin from the anterior to the posterior; has two and one marginal denticles respectively on the two sides of the anterior platform
	9F–9H	MDP8-007	School of Earth Sciences, China University of Geosciences, Wuhan, 430074, China
	9I–9J	MDP8-801	School of Earth Sciences, China University of Geosciences, Wuhan, 430074, China
	9K	MDP8-020	School of Earth Sciences, China University of Geosciences, Wuhan, 430074, China
	9L–9N	MDP8-028	School of Earth Sciences, China University of Geosciences, Wuhan, 430074, China
	9O–9Q	MDP8-022	School of Earth Sciences, China University of Geosciences, Wuhan, 430074, China	big in size, only develops a pair of big and stout anterior marginal denticles
	9R-9S	MDP8_i052	School of Earth Sciences, China University of Geosciences, Wuhan, 430074, China	juvenile species
	9T–9V	MDP8_i050	School of Earth Sciences, China University of Geosciences, Wuhan, 430074, China	adult species; is characterized by a smooth deflection of one platform margin from the anterior to the posterior; has three and one marginal denticles respectively on the two sides of the anterior platform
	9W–9Y	MDP8_i046	School of Earth Sciences, China University of Geosciences, Wuhan, 430074, China
	9Z–9BB	MDP8_i038	School of Earth Sciences, China University of Geosciences, Wuhan, 430074, China	variant species; anteriorly increased marginal denticles with one lateral margin bearing four high denticles and the other margin having two denticles
Mockina sp. A	7P–R	MDP8-031	School of Earth Sciences, China University of Geosciences, Wuhan, 430074, China	are characterized by a deflected posterior platform relative to the anterior platform, which is smooth and bears a rounded platform end
	7S	MDP8-003	School of Earth Sciences, China University of Geosciences, Wuhan, 430074, China
	7T	MDP8-032	School of Earth Sciences, China University of Geosciences, Wuhan, 430074, China
Mockina sp.	3CC	POT2-57	School of Earth Sciences, China University of Geosciences, Wuhan, 430074, China	are characterized by a pair of large marginal denticles on each anterior side and by an additional prominent denticle on one of the posterior platform margins
	3DD–3FF	POT6-32	School of Earth Sciences, China University of Geosciences, Wuhan, 430074, China
	3JJ–3LL	POT2_i058	School of Earth Sciences, China University of Geosciences, Wuhan, 430074, China	are characterized by a pair of large marginal denticles on each anterior side and by an additional prominent denticle on one of the posterior platform margins and a tiny node on the other posterior platform margin
Norigondolella? sp. indet.	3PP–3QQ	POT6_i033	School of Earth Sciences, China University of Geosciences, Wuhan, 430074, China	with flat and unornamented platform margins which extend to or near the anterior end and may have intense microcrenulation, with an excavated groove and with laterally compressed denticles which are fused in the lower parts and are separated near the tips
Parvigondolella andrusovi Kozur and Mock, 1972	6TT–6UU	POT13_i057	School of Earth Sciences, China University of Geosciences, Wuhan, 430074, China	a single blade consists of seven partially fused denticles; the cusp is penultimate and wider than other denticles, and located at the posterior third of the element; the groove is anteriorly shallow and narrow; while the keel end is prolonged and narrowly rounded
Parvigondolella. sp.	6RR–6SS	POT12_i054	School of Earth Sciences, China University of Geosciences, Wuhan, 430074, China	single blade is composed of eight partially fused denticles, with the anterior-most denticle being small and the height of other denticles declining from the anterior to the posterior; the keel is prolonged relative to the pit; the groove doesn’t apparently deepen and stops at the pit
Pavigondolella? vrielyncki Kozur and Mock, 1991	6KK–6LL	POT13_i061	School of Earth Sciences, China University of Geosciences, Wuhan, 430074, China	the basal furrow is narrow and shallowly excavated, extends to both ends of the unit, and expands laterally near the position beneath the cusp
	6MM–6OO	POT1_i059	School of Earth Sciences, China University of Geosciences, Wuhan, 430074, China
Zieglericonus? sp.	4T–4U	MDP7-110	School of Earth Sciences, China University of Geosciences, Wuhan, 430074, China	conic element, bears a small node above the anterior base
	4V–4W	POT6_i034	School of Earth Sciences, China University of Geosciences, Wuhan, 430074, China	conic element, bears a small node above the posterior base
transitional form between M. bidentata and P. andrusovi	6PP–6QQ	POT11_i082	School of Earth Sciences, China University of Geosciences, Wuhan, 430074, China	has only one marginal denticle, the keel posterior to the pit is variably prolonged, the groove anterior to the pit very shallow and narrow
	6VV–6XX	POT1_i010	School of Earth Sciences, China University of Geosciences, Wuhan, 430074, China
	6YY	POT1_i103	School of Earth Sciences, China University of Geosciences, Wuhan, 430074, China
	6ZZ–6AAA	POT8_i089	School of Earth Sciences, China University of Geosciences, Wuhan, 430074, China
?transitional form between M. bidentata and Mi. hernsteini	6BBB–6CCC	MDP25-1	School of Earth Sciences, China University of Geosciences, Wuhan, 430074, China	has only one marginal denticle, the pit is hard to discern, the posterior base is moderately opened and excavated
